# Supplementary material
Source: Springer Nature journal article supplement (https://www.springermedizin.de/resource/supplementary/12931_2013_1476_MOESM1_ESM.pdf/9426288)

**A**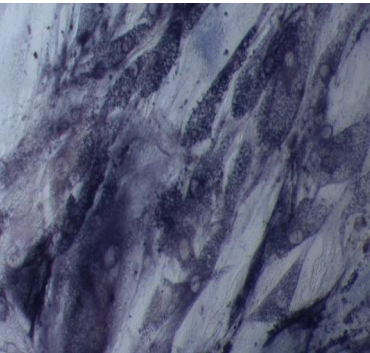**B**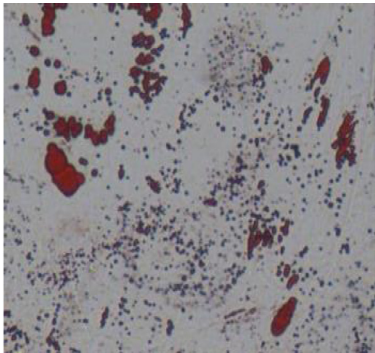

Supplement: MOESM1 [file 9426288]
